# Supplementary material for: Change in Norwegian consumer attitudes towards piglet castration: increased emphasis on animal welfare
Source: PubMed Central journal article supplement (PMC7249416; doi:10.1186/s13028-020-00522-6), 2020-05-26
Supplement: 13028_2020_522_MOESM1_ESM.pdf [file 13028_2020_522_MOESM1_ESM.pdf]

**Additional file 1. Questions included in the consumer survey on different methods of piglet castration.**

| Question |                                                                                                                                                                                                                                                                                                                                    |
|----------|------------------------------------------------------------------------------------------------------------------------------------------------------------------------------------------------------------------------------------------------------------------------------------------------------------------------------------|
| 1        | How often do you eat pork products such as ham, pork chops, pork loin, shredded pork, sausages or other pork products?                                                                                                                                                                                                             |
| 2        | How much do the following factors influence you when buying pork?<br><ol style="list-style-type: none"> <li>1. Appealing appearance</li> <li>2. Good taste</li> <li>3. Easy to prepare</li> <li>4. Low cost</li> <li>5. Low fat</li> <li>6. Free of additives</li> <li>7. Animal welfare</li> <li>8. Produced in Norway</li> </ol> |
| 3        | Which factors do you consider to be the most important for pig welfare in Norway? <sup>a, b</sup>                                                                                                                                                                                                                                  |
| 4        | Did you know that almost all male pigs in Norway, except breeding pigs, are castrated when young?                                                                                                                                                                                                                                  |
| 5        | Do you know why male pigs in Norway are castrated? <sup>c</sup>                                                                                                                                                                                                                                                                    |
| 6        | What do you think about the current castration practice in Norway?                                                                                                                                                                                                                                                                 |
| 7        | What do you think about each of these four methods?<br><ol style="list-style-type: none"> <li>1. Surgical castration with anesthesia</li> <li>2. Surgical castration without anesthesia</li> <li>3. Vaccination against boar taint</li> <li>4. No castration</li> </ol>                                                            |
| 8        | When answering the previous question, what was more important to you? Animal welfare, food safety or eating quality?                                                                                                                                                                                                               |
| 9        | Why do you consider surgical castration without anesthesia to be unacceptable? <sup>a, d</sup>                                                                                                                                                                                                                                     |
| 10       | Why do you consider vaccination against boar taint to be unacceptable? <sup>a, e</sup>                                                                                                                                                                                                                                             |
| 11       | What do you think about each of these four methods?<br><ol style="list-style-type: none"> <li>1. Surgical castration with anesthesia</li> <li>2. Surgical castration without anesthesia</li> <li>3. Vaccination against boar taint</li> <li>4. No castration</li> </ol>                                                            |

Stippled line indicates where respondents were provided the three statements regarding castration presented in Table 1.

<sup>a</sup> Respondents provided unaided answers to question

<sup>b</sup> Only asked those who considered animal welfare to be rather or very important in question 2 (N = 416)

<sup>c</sup> Only asked those who knew that male pigs are castrated in question 4 (N= 400)

<sup>d</sup> Only asked those who answered that surgical castration with anesthesia was unacceptable in question 7 (N= 54)

<sup>e</sup> Only asked those who answered that vaccination against boar taint was unacceptable question 7 (N= 104)
